# Supplementary material for: Reconstruction of the Global Neural Crest Gene Regulatory Network In Vivo
Source: PubMed Central journal article supplement — Dev Cell. 2019 Oct 21;51(2):255–276.e7. doi: 10.1016/j.devcel.2019.10.003 (PMC6838682; doi:10.1016/j.devcel.2019.10.003), 2019-10-21
Supplement: mmc1.pdf [file mmc1.pdf]

**Developmental Cell, Volume 51**

**Supplemental Information**

**Reconstruction of the Global Neural Crest**

**Gene Regulatory Network *In Vivo***

**Ruth M. Williams, Ivan Candido-Ferreira, Emmanouela Repapi, Daria Gavriouchkina, Upeka Senanayake, Irving T.C. Ling, Jelena Telenius, Stephen Taylor, Jim Hughes, and Tatjana Sauka-Spengler**

# Reconstruction of the global neural crest gene regulatory network *in vivo*

Ruth M Williams<sup>1</sup>, Ivan Candido-Ferreira<sup>1</sup>, Emmanouela Repapi<sup>2</sup>, Daria Gavriouchkina<sup>1,5</sup>, Upeka Senanayake<sup>1</sup>,  
Irving T C Ling<sup>1,4</sup>, Jelena Telenius<sup>2,3</sup>, Stephen Taylor<sup>2</sup>, Jim Hughes<sup>2,3</sup>, and Tatjana Sauka-Spengler<sup>1,\*</sup>

---

## Supplemental Material

---

---

\*Lead and corresponding author: Tatjana Sauka-Spengler (tatjana.sauka-spengler@imm.ox.ac.uk)

<sup>1</sup>University of Oxford, MRC Weatherall Institute of Molecular Medicine, Radcliffe Department of Medicine, Oxford, OX3 9DS, UK

<sup>2</sup>University of Oxford, MRC Centre for Computational Biology, Weatherall Institute of Molecular Medicine, Oxford, OX3 9DS, UK

<sup>3</sup>University of Oxford, MRC Molecular Haematology Unit, Weatherall Institute of Molecular Medicine, Oxford, OX3 9DS, UK

<sup>4</sup>University of Oxford, Department of Paediatric Surgery, Childrens Hospital Oxford, Oxford, UK

<sup>5</sup>Present Address: Okinawa Institute of Science and Technology, Molecular Genetics Unit, Onna, 904-0495, Japan

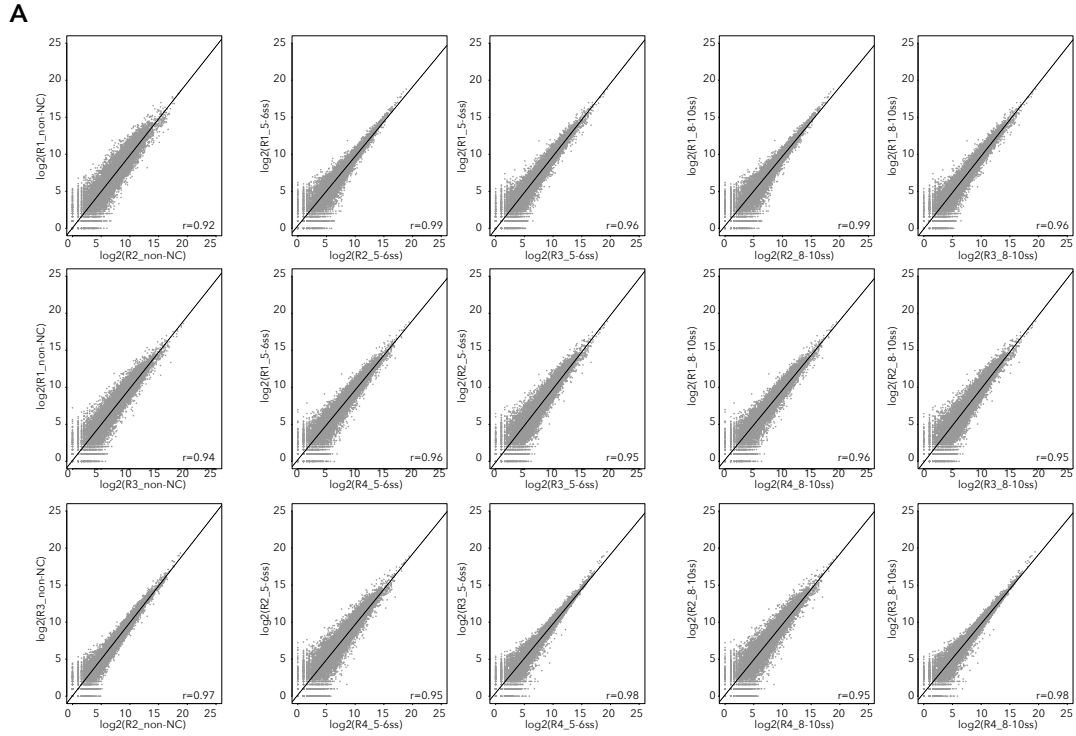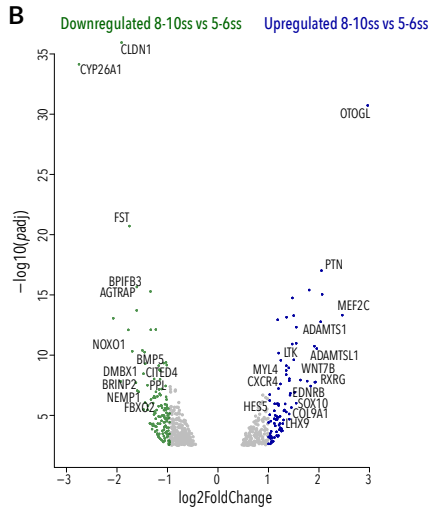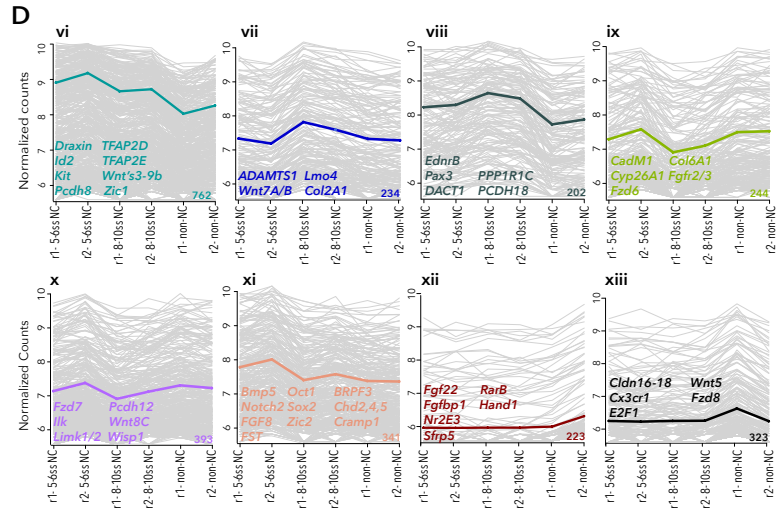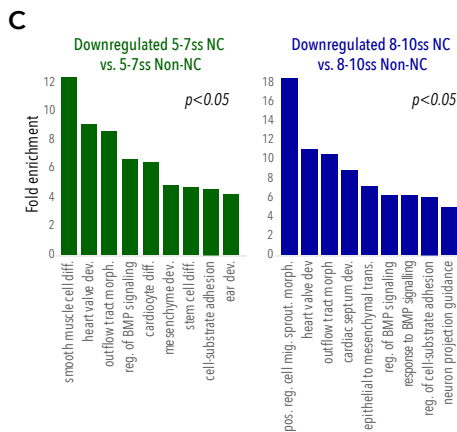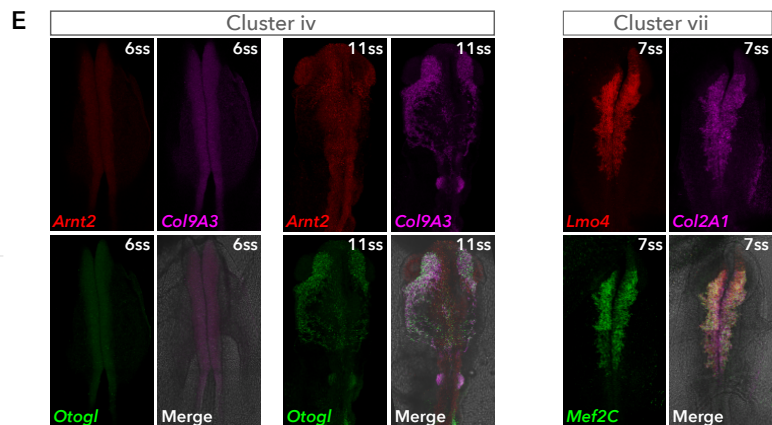

**Figure S1. RNA-seq quality control and reproducibility. Related to figure 1** (A) Scatter plots showing correlation of RNA-seq replicas.  $r$ = Pearson correlation co-efficient. (B) Volcano plot of genes enriched and depleted at 8-10ss compared to 5-6ss. Differential expression analysis was performed using DESeq2 with a negative binomial model,  $p$ -values were calculated using Wald test, with Benjamin-Hochberg correction for multiple testing ( $p$ -adjusted,  $p_{adj}$ ). (C) Gene ontology terms associated with genes depleted in NC compared to non-NC cells at 5-6ss and 8-10ss ( $\text{LogFoldChange} < -1$ ,  $p_{adj} < 0.05$ , base mean  $> 50$ ) . Enriched GO terms were obtained using statistical overrepresentation test,  $p$ -values were calculated with binomial distributions and Bonferroni correction for multiple hypothesis testing. (D) Clusters (vi-xiii) of highly correlated genes identified by WGCNA. (E) Co-localisation of gene expression for selected genes from cluster-iv and vii obtained using HCR (Hybridisation Chain Reaction).

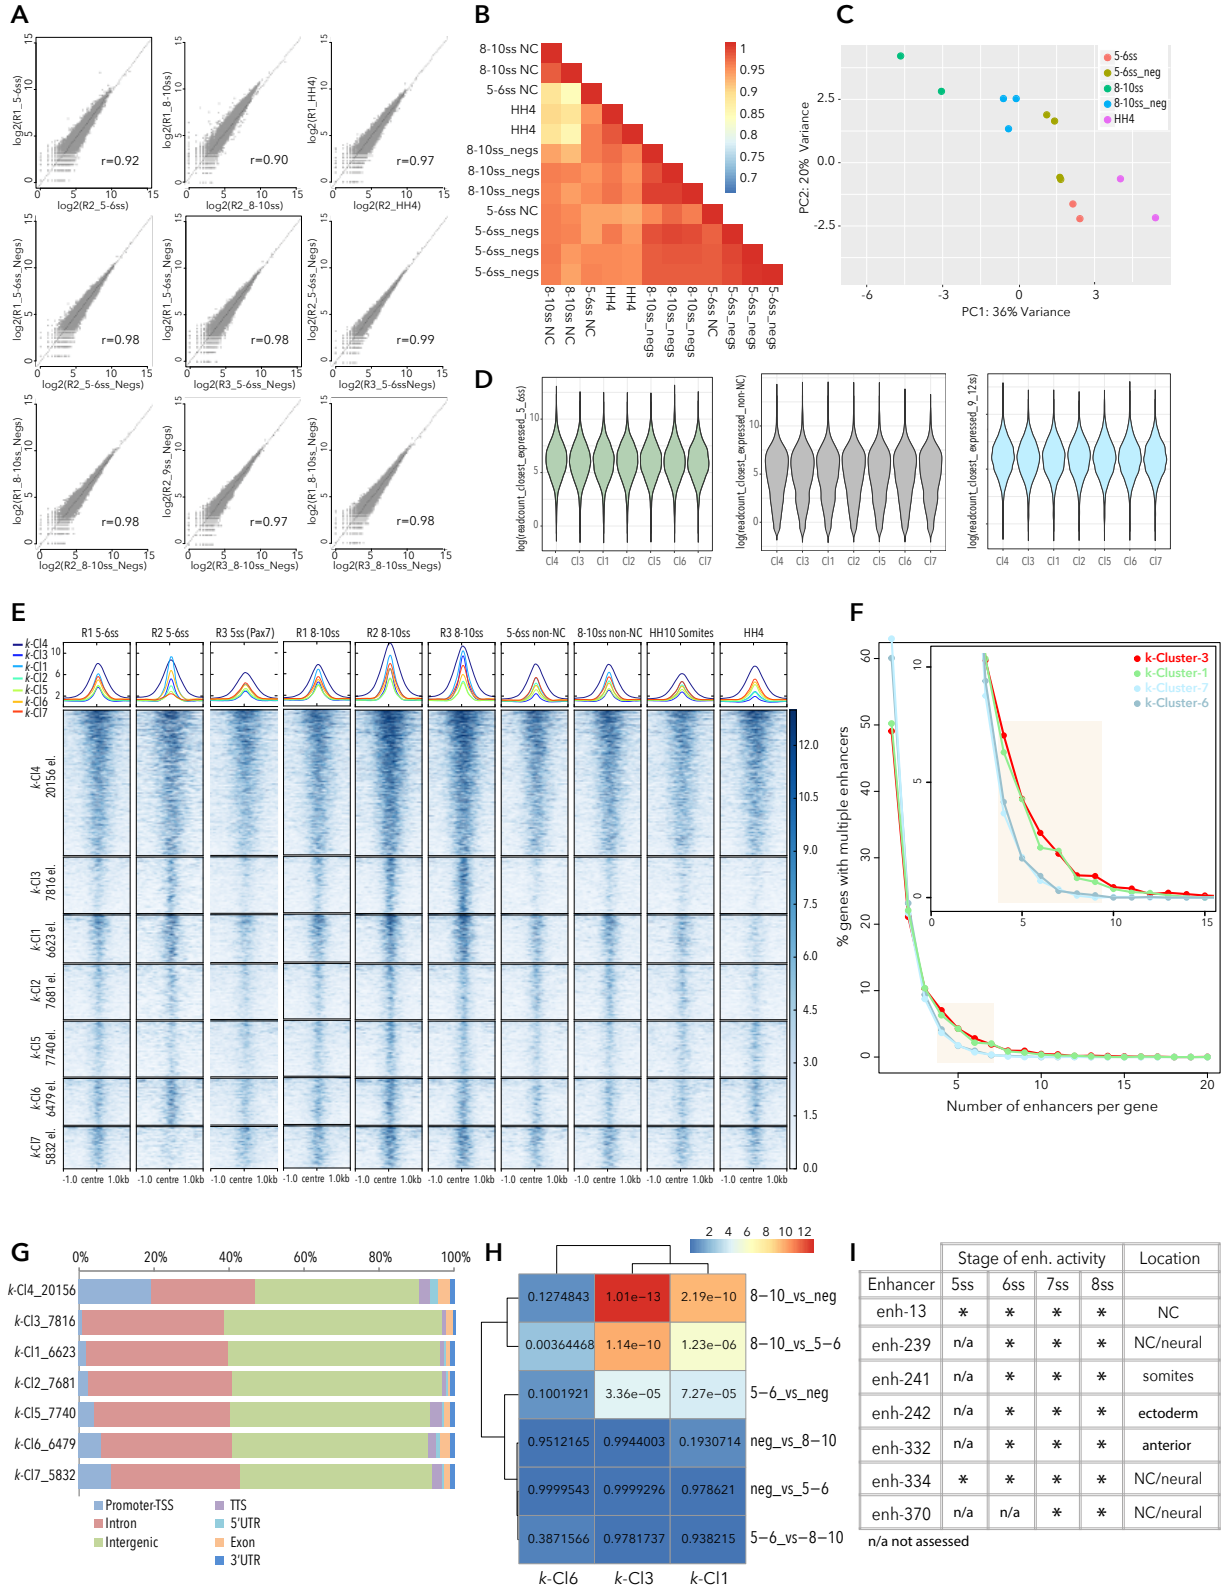

**Figure S2. ATAC-seq quality control and chromatin accessibility dynamics. Related to Figures 2 and 3.** (A) Scatter plots showing correlation of ATAC-seq replicates,  $r$ = Pearson correlation co-efficient. (B) Matrix presenting the Pearson correlation coefficients to all possible pairwise comparisons of replicates/samples. (C) PCA comparing NC and non-NC cells at both stages and HH4 ATAC-seq samples. (D) Violin plots showing correlation between  $k$ -Cluster elements and gene expression levels. (E) Heatmap and merged profiles depicting  $k$ -means linear enrichment clustering of ATAC signal across all samples/stages analysed. Pax7 sample is NC cells isolated using the *Pax7* enh-195 (Figure S3D). (F) Percentage of genes with multiple associated enhancers. (G) Stacked bar plot showing genomic annotation of  $k$ -Cluster elements. The number of elements in each  $k$ -Cluster is also shown. (H) Heatmap represents statistical significance of the associations of differentially expressed genes as per bulk RNA-seq analysis and selected  $k$ -means clusters calculated as overrepresentation of enriched/depleted genes within the sets of genes regulated by the given  $k$ -means cluster.  $P$ -values, calculated using two-tailed hypergeometric test, are shown in the corresponding positions within the heatmap. Colour bar corresponds to  $-\log(p\text{-values})$ . (I) Table summarising spatio-temporal *Snai2* enhancer activity.

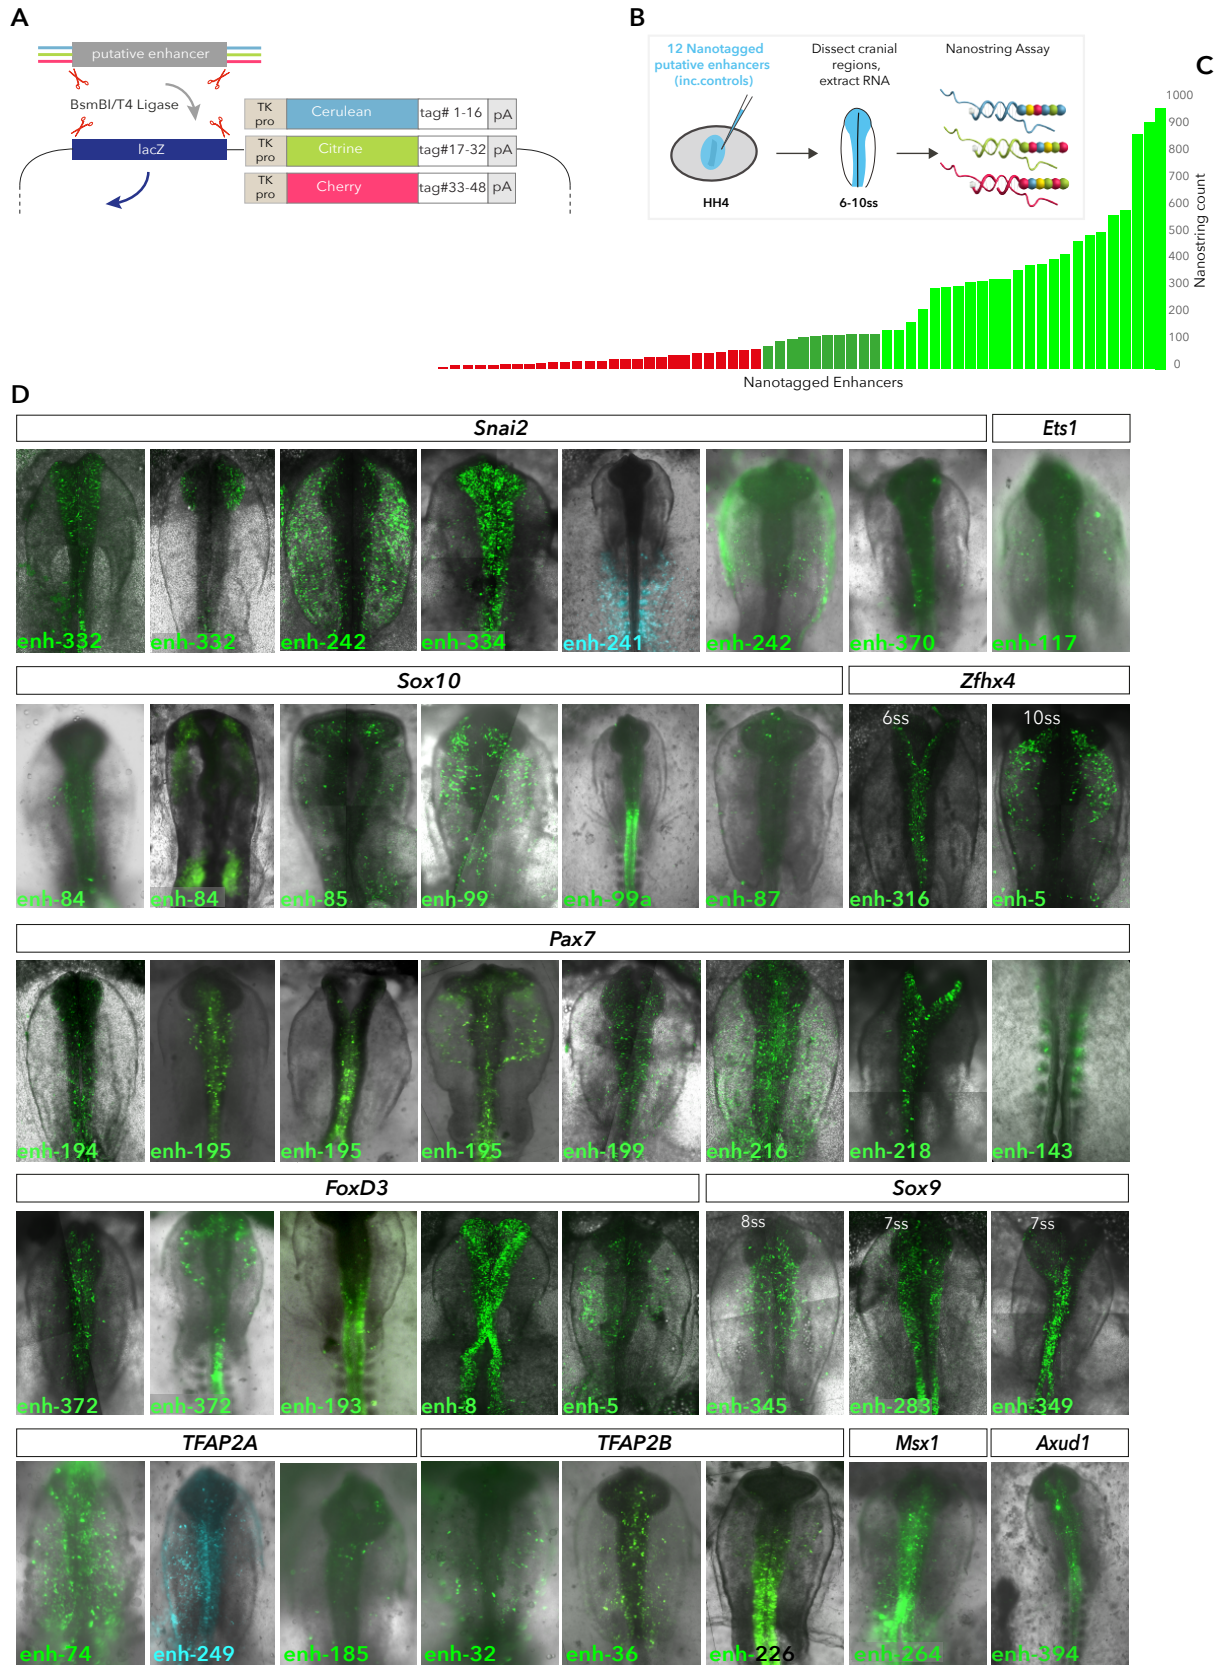

**Figure S3. Multiplexed high-throughput enhancer screening. Related to Figures 3 and 4.** (A) Schematic depiction of enhancer cloning strategy. (B) Cartoon showing *ex ovo* electroporation technique and Nanostring assay. (C) Bar graph representing typical Nanostring results. Nanostring count (of nanotag transcripts) above 50 (green) was determined to reflect *in vivo* enhancer activity. (D) *In vivo* activity of selected enhancers. Imaging was performed using either fluorescent stereo microscope or confocal microscopy. In the latter case, embryo z-stack scans were collected across approximately 50-70  $\mu\text{m}$ , and horizontal tiling was used to image the entire embryo at high magnification. In such cases, images were processed using bidirectional stitching mode of the Zeiss Zen microscope software with 10% overlap. For confocal images, the maximum intensity projection of a z-stack is shown.



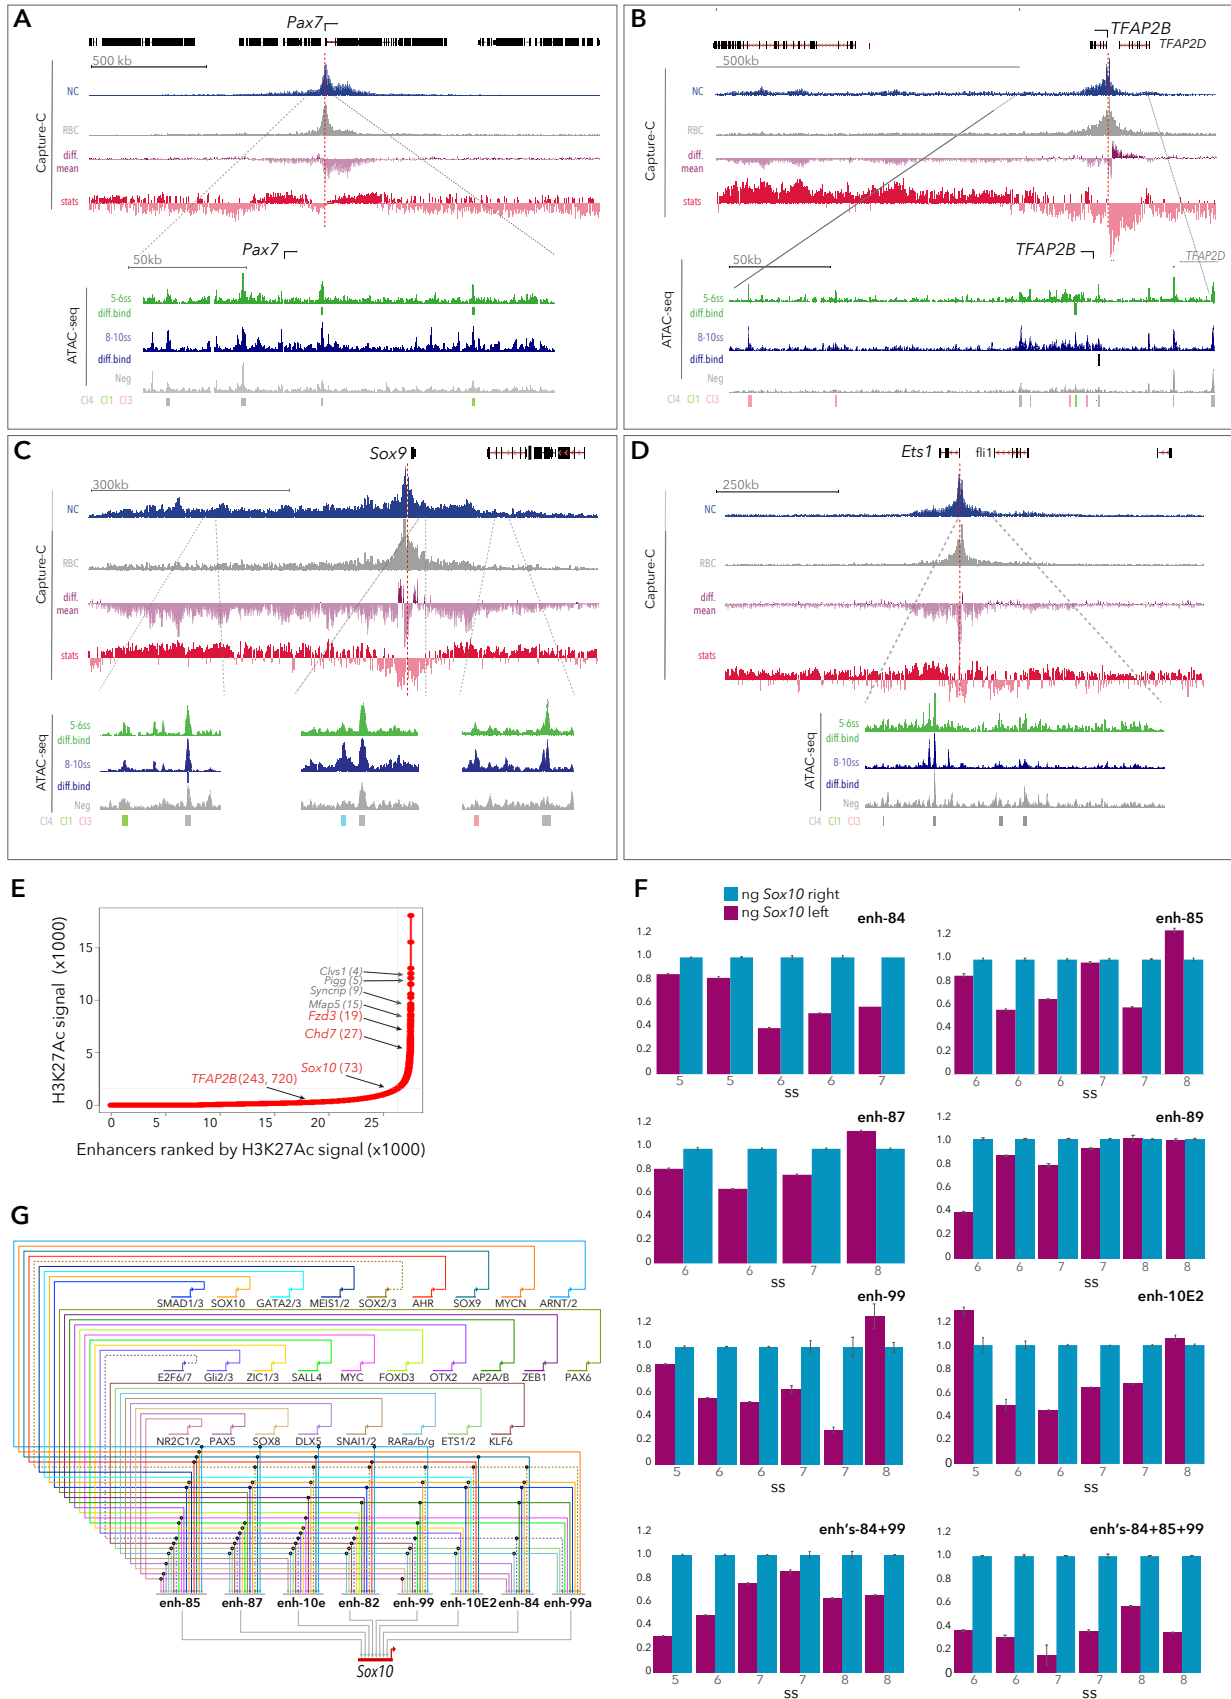

**Figure S4. Capture-C at NC loci and decommissioning super-enhancer elements controlling *Sox10* expression. Related to Figures 3 and 4.** Genome browser views of chromosome conformation capture from the *Pax7* (A), *TFAP2B* (B), *Sox9* (C) and *Ets1* (D) promoters (Capture-C) and associated statistical analysis of the differences between Capture-C profiles in NC and RBC (n=4 each). Raw counts of unique interactions mapped to each restriction fragment were analysed using the bioconductor package DESeq2. The red dashed line denotes the position of the capture probe. Tracks show the Capture-C normalised counts from raw count per restriction fragment from NC cells (blue) and RBCs (grey), respectively. The differential mean track (purple) specifically highlights proximal and distal interaction blocks, with NC-specific interactions overlapping distal *cis*-regulatory elements (ATAC-seq tracks and mapped analysed *k*-Cluster and Diffbind elements). The majority of differences are with elements that interact more strongly in NC than in RBCs and the DESeq2 analysis highlighted these interactions as being statistically significant. Statistical significance is presented in the form of the DESeq2 Wald statistics track (stat, in red), which determines significance of difference in interactions between NC and RBCs, and is calculated as a ratio of LogFoldChange values and their standard errors, determined using DESeq2, *p*-values calculated with Wald test and Benjamin-Hochberg correction. This indicates the significant differences between NC and RBC profiles, and points to both proximal and distal interactions. (E) Enhancers ranked by H3K27ac signal from 5-6ss, using the ROSE algorithm, top-ranked genes are annotated. (F) qPCR for *Sox10* following dCas9-Krab mediated decommissioning of associated enhancers using bilateral electroporation (Fig. 4K-N). *Sox10* on the left (experimental) side of embryos shown in magenta, right (control) side shown in blue. Error bars show standard deviation. (G) *Sox10* gene regulatory sub-circuit inferred from known vertebrate TF binding models. Interactions via five novel enhancers (enh-82, enh-84, enh-85, enh-87, enh-99) and published 10E and 10E2 enhancer are shown. Dashed lines represent possible repressive interactions

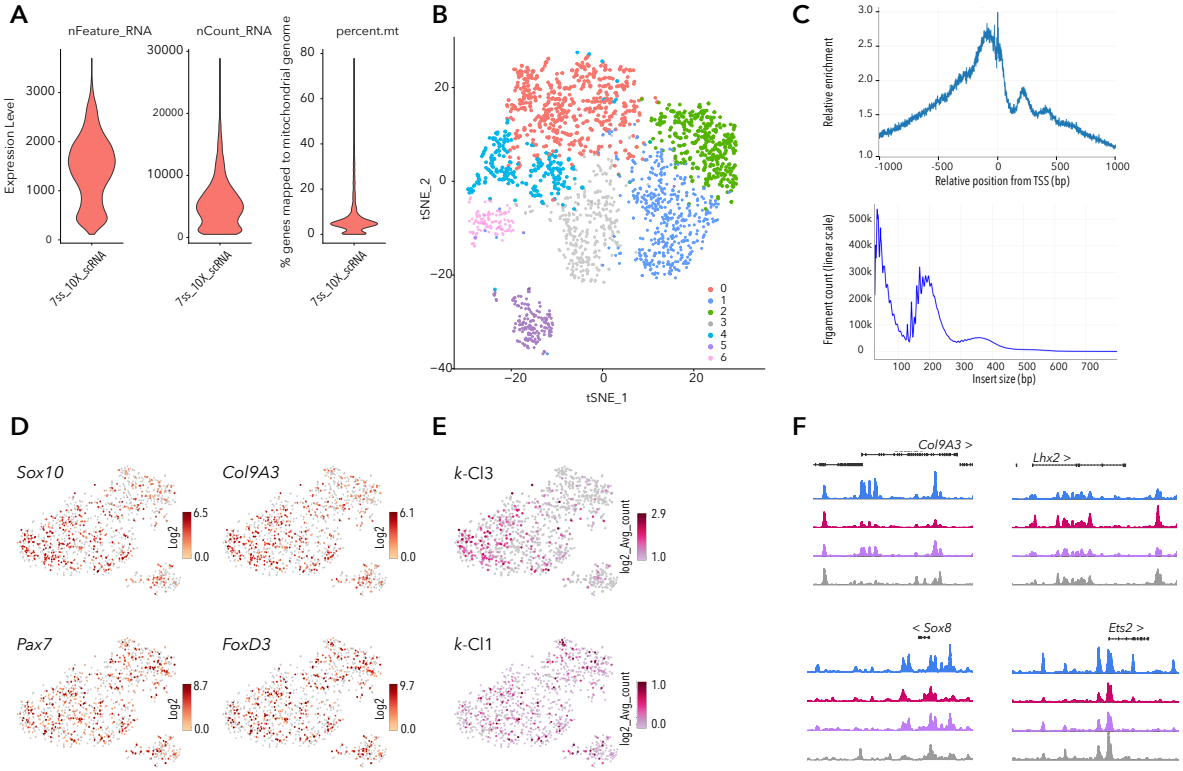

**Figure S5. Quality control of scRNA and scATAC experiments. Related to Figure 5.** (A) Violin plots showing distribution of nFeatures, nCounts and reads mapped to mitochondrial genome. Features were filtered to include >200 and <3000, counts filtered to <10000 and mitochondrial reads <10%. (B) tSNE of all 7 10X Chromium scRNA-seq clusters. (C) Distribution and size of scATAC peaks. (D) tSNEs highlighting NC genes across scATAC clusters. (E) tSNE plots showing localisation of *k*-Clusters across scATAC clusters. (F) scATAC profiles at selected NC gene loci.

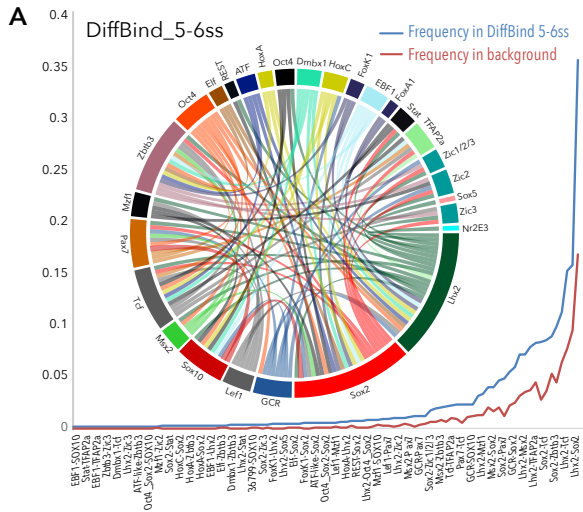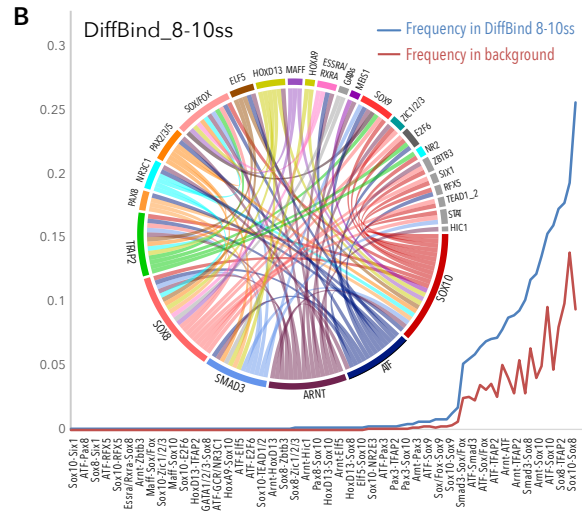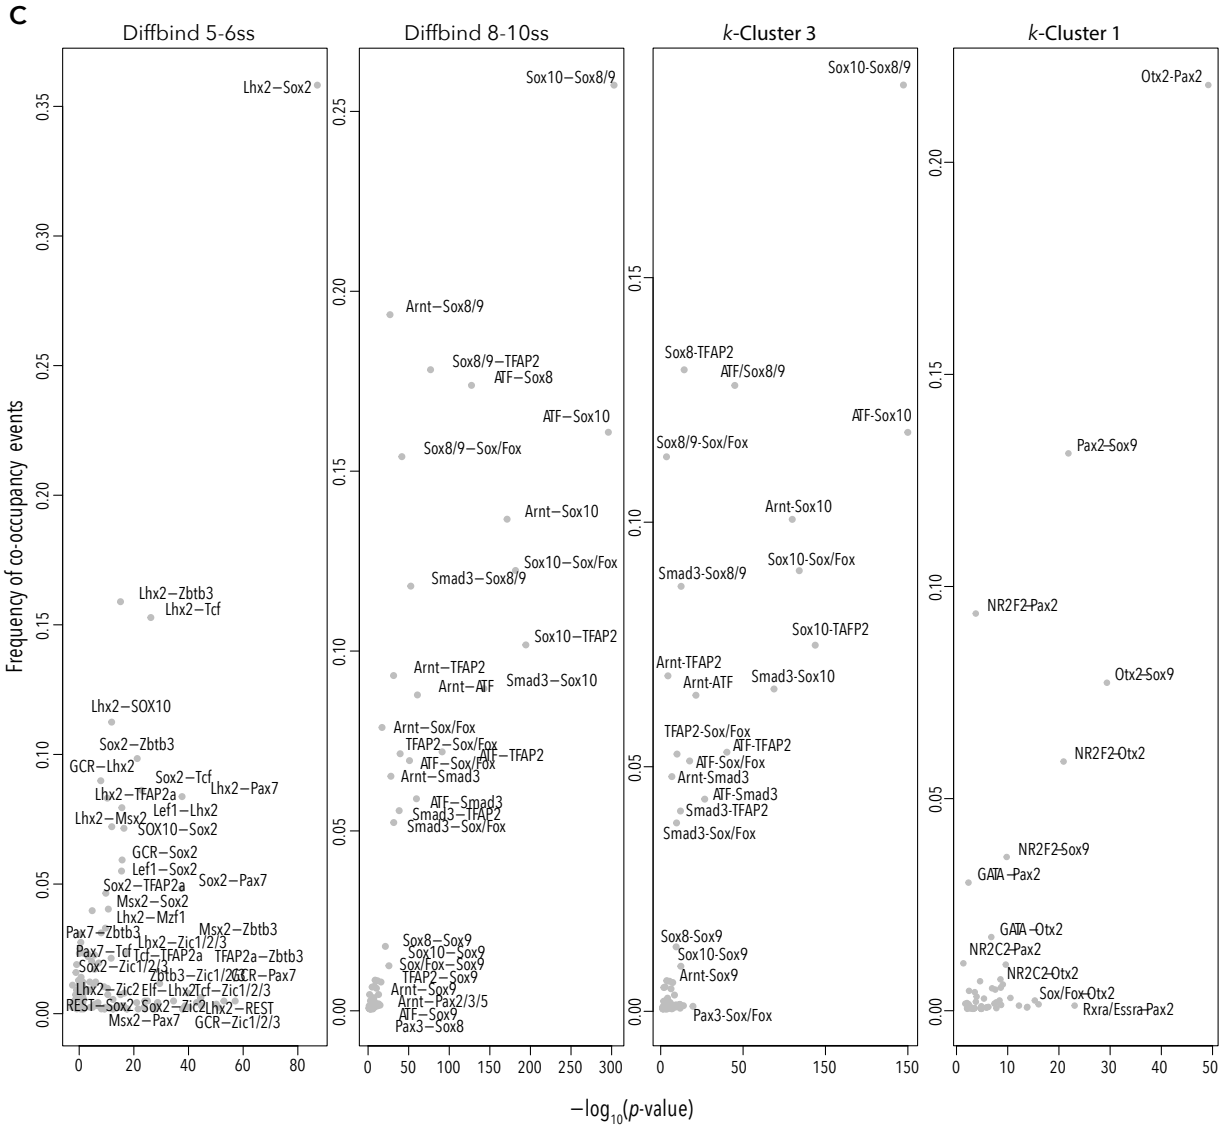

**Figure S6. Combinatorial transcription factor binding in DiffBind elements. Related to Figure 6. (A, B)** Motif co-occurrence frequencies and circular spider plots showing putative TF combinatorial binding interactions in DiffBind 5-6ss **(A)** and DiffBind 8-10ss **(B)**. **(C)** Annotated scatter plots showing frequency of TF co-occupancy events and statistical significance in DiffBind 5-6ss, 8-10ss and *k*-Cluster-3 and *k*-Cluster-1. *P*-values were calculated using two-tailed Chi-squared test, with Bonferroni correction for multiple hypothesis testing.

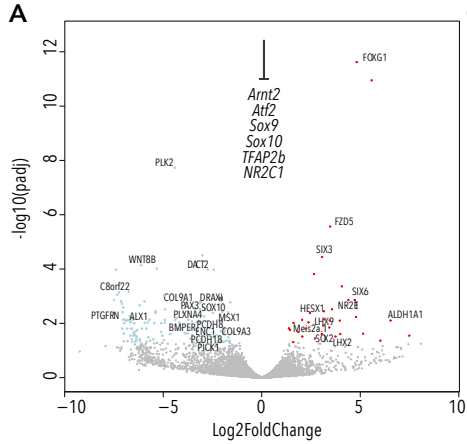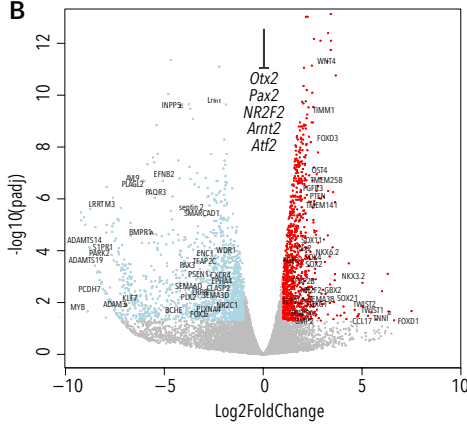

|             |             |          |
|-------------|-------------|----------|
| 0.014172325 | 0.772625644 | TWIST2   |
| 0.018990101 | 1           | TWIST1   |
| 0.001388304 | 0.551650438 | NKX2.2   |
| 0.009550304 | 0.574670461 | SOX2.1   |
| 0.032890356 | 0.968634956 | TNFR2    |
| 0.000000000 | 0.000000000 | FOXO1    |
| 0.013763471 | 0.036090569 | LHX2     |
| 0.3084748   | 0.01206979  | GRIA2    |
| 0.48805416  | 0.003042112 | NR2E1    |
| 0.359932502 | 0.030318199 | ALDH6    |
| 0.000220285 | 0.015629886 | PDCFD    |
| 0.933412514 | 0.007783007 | ZNF3850  |
| 0.700191337 | 0.017625556 | ALDH1A1  |
| 0.013171092 | 2.38843e-12 | FOXG1    |
| 0.644193545 | 0.001390684 | SIX6     |
| 0.96920537  | 2.73246e-06 | FZD5     |
| 0.9507796   | 0.024464709 | PDCFD    |
| 0.451827235 | 3.57577e-05 | SIX3     |
| 0.839867756 | 0.024772701 | LGALS2   |
| 0.376495134 | 0.014201345 | PITX1    |
| 0.127236031 | 0.05897017  | SFRP1    |
| 0.59983741  | 0.00740099  | HESX1    |
| 0.732549153 | 0.017345972 | MES2     |
| 0.786533506 | 0.020613756 | SMARCA2  |
| 0.628801387 | 0.048752119 | LINGO1   |
| 0.668263093 | 0.071976684 | PITX2    |
| 0.214994891 | 0.083324262 | BSP.RY   |
| 0.048004138 | 0.339064782 | BMP2     |
| 0.019129298 | 0.192183442 | TCF7L2   |
| 0.000325028 | 0.176610739 | FGFR1    |
| 5.49181e-07 | 0.601677127 | FGFR3    |
| 5.50902e-05 | 0.423062545 | SOX11    |
| 2.55477e-06 | 0.348064058 | TMEM141  |
| 0.000240062 | 0.43393772  | TMEM258  |
| 2.01532e-07 | 0.358565071 | TMEM258  |
| 5.58098e-10 | 0.264805413 | TIMM1    |
| 9.07641e-07 | 0.23775787  | PTEN     |
| 1.81353e-07 | 0.192183442 | OST4     |
| 0.00033122  | 0.030318199 | SOX2     |
| 0.006489729 | 0.163277504 | NR2F2    |
| 0.011514115 | 0.445183256 | SEMA3B   |
| 0.001444423 | 0.291939953 | PCDH7    |
| 0.000128693 | 0.07867983  | ADAMTS19 |
| 0.001593557 | 0.074424878 | ERG      |
| 5.94051e-06 | 0.00155392  | RFK2     |
| 8.36474e-06 | 0.007182686 | PTCFRN   |
| 0.07417936  | 0.052554944 | AMER3    |
| 0.091502727 | 0.007349504 | DCN      |
| 0.016107667 | 0.020613756 | EGMES    |
| 0.000139507 | 0.597447531 | ADAMTS14 |
| 0.000109828 | 0.852496095 | STPR1    |
| 2.21064e-06 | 0.090608003 | LRF1M3   |
| 0.0001433   | 0.597734213 | PARK2    |
| 2.08592e-07 | 0.735720174 | PLAGL2   |
| 0.010131532 | 0.50880702  | KLF7     |
| 1.92908e-07 | 0.01608374  | AVL9     |
| 2.72065e-05 | 0.122335169 | BMPR1A   |
| 8.11402e-07 | 0.235291258 | PACR3    |
| 0.00589896  | 1.85865e-08 | PLX2     |
| 1.62242e-07 | 0.126574304 | EFN2     |
| 0.028789564 | 0.017284009 | BCHE     |
| 0.083386169 | 0.00740099  | ALX1     |
| 0.873937773 | 0.000573988 | LIFR     |
| 0.573529041 | 0.000670286 | C8orf22  |
| 0.843149856 | 0.083324262 | SMAD9    |
| 0.428298428 | 0.059367249 | PDCFRA   |
| 0.806144109 | 0.024772701 | PDK4     |
| 0.525572292 | 9.53648e-05 | WNT8B    |
| 0.649049161 | 0.069854094 | COL6A2   |
| 0.011249357 | 0.751848601 | NRX1     |
| 0.000134846 | 0.555102458 | WDR1     |
| 0.004151566 | 0.616650828 | CLASP2   |
| 0.001822159 | 0.36074488  | EPHA4    |
| 0.001468149 | 0.343546395 | CXCR4    |
| 5.33384e-06 | 0.389338354 | SMARCA1  |
| 2.80182e-06 | 0.869738689 | Seprin.2 |
| 0.005032474 | 0.678010127 | SEMA6D   |
| 0.000350538 | 0.927203168 | TFAP2C   |
| 2.30286e-10 | 0.810107971 | Lrm1     |
| 0.00562514  | 0.980245967 | LRP8     |
| 0.039568208 | 0.920191783 | FCM2     |
| 0.00052698  | 0.00394905  | PAC3     |
| 3.35651e-10 | 0.795605412 | INPSE    |
| 0.156753116 | 0.04808017  | PICK1    |
| 0.015576819 | 0.068043786 | CDH13    |
| 2.11662e-05 | 0.00010501  | TNFRSF19 |
| 0.00048491  | 0.015629886 | PCDH8    |
| 0.000127202 | 0.019670217 | ENC1     |
| 0.005127379 | 0.087766837 | DACH2    |
| 0.001797059 | 0.032880384 | CXCR7    |
| 0.001182681 | 0.088594565 | PSEN1    |
| 0.000449837 | 0.028154577 | STX17    |
| 0.007795958 | 0.001624447 | COL9A1   |
| 0.037537585 | 0.005478977 | PLXNA4   |
| 0.037537585 | 0.005478977 | PLXNA4B  |
| 0.014573176 | 0.02933407  | PCDH18   |
| 0.007796035 | 0.054401696 | SEMA3D   |
| 0.002550573 | 0.00010501  | DACT2    |
| 7.2941e-12  | 0.853009121 | WRN4.2   |
| 6.45776e-09 | 0.958427594 | FOXO3    |
| 0.020394754 | 0.991308789 | TFAP2A   |
| 0.000147849 | 0.635062102 | PAX2     |
| 0.002222909 | 0.601323216 | TFAP2B   |
| 0.009189114 | 0.690592011 | GBX2     |
| 0.004758973 | 0.003978979 | MSX1     |
| 0.00018482  | 0.054449654 | NKX2.2   |
| 0.56180499  | 0.058458839 | MATN1    |
| 0.85815462  | 0.087276705 | COL6A1   |
| 0.64467865  | 0.019670217 | BMPER    |
| 0.293973976 | 3.07915e-05 | ASTL     |
| 0.485180839 | 0.019670217 | COL9A3   |
| 0.562652019 | 0.003862918 | SOX10    |
| 0.380008885 | 0.079086477 | SOX9     |
| 0.863277287 | 0.001672288 | DRAXIN   |

k-C11 TF knockout      k-C13 TF knockout

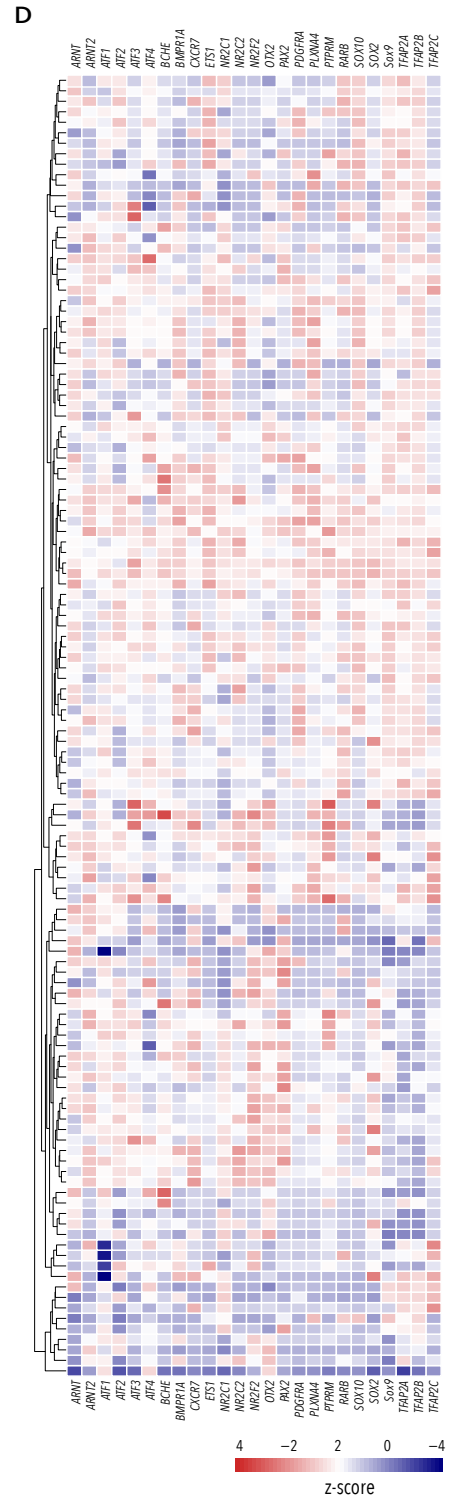

**Figure S7. Perturbation of core NC-GRN transcription factors. Related to Figure 6.** (A-B) Volcano plots showing misregulated genes following CRISPR knockout of core TFs associated with *k*-Cl3 (A) and *k*-Cl1 (B). Differential expression was determined using DESeq2 with a negative binomial model, and hypothesis testing was performed with the Wald test corrected using the Benjamin-Hochberg method for multiple testing (*p*<sub>adj</sub>). Only genes with *p*<sub>adj</sub><0.1 and Log<sub>2</sub>Foldchange>1 (in red) or Log<sub>2</sub>Foldchange<1 (in blue) are coloured. (C) Heatmap showing LogFoldChange (experimental versus control side) for a subset of differentially expressed genes following knockout of the core *k*-Cl3 factors (1st column) and the core *k*-Cl1 factors (second column). Corresponding *p*-values are annotated. (D) Heatmap showing single-cell co-expression of targeted core TFs and selected misregulated genes following CRISPR knockout of core TFs. Colour bar represents z-score.



Supp. table 1. Capture-C targets and oligo sequences. Related to figure 2.

| Gene target | GalGal4 location             | Capture oligo sequence                                                                                                                                                                                                                            |
|-------------|------------------------------|---------------------------------------------------------------------------------------------------------------------------------------------------------------------------------------------------------------------------------------------------|
| Sox10       | chr1:50,912,325-50,912,444   | TTTTCAAATCAGGGGACAGTGTGCTGTGGCAGGGACTTACAGAGGTGACTGCAGACAGTGAGAGAGGAGGGGTGCACAGGGCAGGCAGCTCAGGTCC TGGGCTTCTCTTCAAGTTGATCGATCAAGGCATGCTGGGGATGTGGAT ACCACAAGCGTGTGGTGGTGGCGGGGTAAGGAAGGGGAGCTCAGCCC TGGGTTGCACAACCTTCACATCCCTTCTGTGACCAGCAACTCCA   |
| Sox9        | chr18:9,068,402-9,068,521    | AGCCGGGCTGCGCGCTGGTGGAGACTCCGTCTCTGCCGGCTTACTTCT TGTTTTAAACCTTCCCCGCCCTCAGCCGCCGGTTGTTTTTTTCTC TCCGTTTTTCTCCTCCCTGATCGATCCGCGGGAAACCCCTCCGGCAGCA GCGCACGGACTTCGGCGCTGGGAAGCCGAAGCCGTCGCGGGGCGGAG CGAAGAGAAGCGCAACGGCTCCCACCGCCCGCGCCCGCCCG        |
| Lmo4        | chr8:14,676,982-14,677,101   | GCTTTTTTAATGGAGACGGAGGGAGGGACGCGCGGAGAGCTGGCAATTT GTAGGACGAAAATGGATGCTTAATTCACGTCTCGGTTTTAATTAGGTGA TTCACCGGATTTCTCCGGATCGATCTTCCCCCGCAGCCGGCGCACCT CTTCCACGAGAGGGAGCCCGCCGTACCAGGGGGCGGCTGCGCGCTGCCG CCGGGTTCACCATGGCCTGCGGGAGAGCGCGCGGGTCAAGGG  |
| Pax7        | chr21:4,443,114-4,443,233    | TTTGGGCGGTTGGAGCTCCTTTCCACGCGCGCCTTTCCCGAGCAG CTGTGCCGCTTTGCTCTTTATTTCTCCTCCCGTTTCAAGTAGTGAGGAG CCGGCTTTCAGAAAGCCAGGATCGATCCAATTCATTAAGGATGCTAATGA AGGAGGTGCGTCGGGAGCCCGAGCGCAGAGCGGAGGGTTTGGGTCT CATTTCCGCCCTATATACGGGGGGTGTGTGGAAGGAATGCTG      |
| Snai2       | chr2:108,126,987-108,127,106 | GATCCTCTTTGAATAACTGAGTTCAGTGGATGAACAACTTCATGATT CATTCCGAGCAGCGCTGACATATTTGTCCGAAGTGCCTCACTGTAAGCA CGGCAAAAAACAGAGCTAGCGGGGAGAAGCGCAGCTCTTCACAGCACT GAGGGCAAAGCTGCTGCTTTCTTCACTGTACAGAAACGATTAATCCA CTTTTGGAAGGGACGTTCTGTGACGCGGTCGCCTCTCAGCGATC   |
| TFAP2b      | chr3:107,873,143-107,873,262 | GATCCATCTATAATTTGAAATGGGGACAGACACCAAAATCCGACGTTCC TCTTCCATCGCAACTTATATCTGTTGTCTGAAACAATAGGCTGCAGAAG TAAACCTCAATCGGATAGTAAAGACATATATAAAGTGACCCATTTATAT ATGTAATATATATATTTCTCGCTTATGTATGATTACATAGGCACAT GTATGCTACACGTTACATATGCATATATGCATACAACTGATC   |
| Zfx4        | chr2:119,024,967-119,025,086 | TTTTGGAACAGCTGTAATTTAGTGTAGAGCTATTAGTGAGCTGTGTCA TATTTAATAAAAATGGCTTCTCTCACCTTATTTTTTATCCAGGTCCTG ACAGGCTGGATGAAATGAGATCGATCTGCAAGGACTCGGAGTAGCTTAG GCTGTAATCAGGCTACTATTACAGTGGCTGGAGCCTTGCAGGCTCCCAA AAAATGAAGGAAAGCAGACTTTTAACCAATGTGTGACCAACTT |
| aGlobin     | chr14:12,097,459-12,097,578  | GATCCTAACACTAACCCAGCTCGCGTCGGGGTCCAACCCCGCAGCCT GCGCAGTATCGTGGTGGGGCAGGGCAGCAGCCCTGCCGCTGGCTGGGGT CAGAACTATGGGGCGGCTGGACAAGAACACGTCAGGGCATCTTCA CCAAAATCGCCGGCCATGCTGAGGAGTATGGCGCCGAGACCTGGAAAG GTAGGTGCTCTCTGTCTCCGGCTGCCTCTCTCCCTGATC          |

**Supp. table 2. Primer design for multiplex enhancer cloning and Nanostring screening.** Related to figure 2.

|                              | Primer sequence |                    |                           |                                    |
|------------------------------|-----------------|--------------------|---------------------------|------------------------------------|
|                              |                 | BsmBI binding site | Vector specific overhangs | Target specific sequence (~20nt)   |
| Cerulean vectors F           | TTTTTT          | CGTCTC             | ccatgg                    | nnnnnnnnnnnnnnnnnnnn               |
| Cerulean vectors R           | TTTTTT          | CGTCTC             | ggtcct                    | nnnnnnnnnnnnnnnnnnnn               |
| Citrine vectors F            | TTTTTT          | CGTCTC             | gccagg                    | nnnnnnnnnnnnnnnnnnnn               |
| Citrine vectors R            | TTTTTT          | CGTCTC             | caacag                    | nnnnnnnnnnnnnnnnnnnn               |
| Cherry vectors F             | TTTTTT          | CGTCTC             | gtgcag                    | nnnnnnnnnnnnnnnnnnnn               |
| Cherry vectors R             | TTTTTT          | CGTCTC             | caccgt                    | nnnnnnnnnnnnnnnnnnnn               |
| Cerulean neg control oligo F | TTTTTT          | CGTCTC             | ccatgg                    | AGCTGGATCGATgatatcCGATCGATCGTAGCAC |
| Cerulean neg control oligo R | TTTTTT          | CGTCTC             | ggtcct                    | GTGCTACGATCGATCGgatatcATCGATCCAGCT |
| Citrine neg control oligo F  | TTTTTT          | CGTCTC             | gccagg                    | AGCTGGATCGATgatatcCGATCGATCGTAGCAC |
| Citrine neg control oligo R  | TTTTTT          | CGTCTC             | caacag                    | GTGCTACGATCGATCGgatatcATCGATCCAGCT |
| Cherry neg control oligo F   | TTTTTT          | CGTCTC             | gtgcag                    | AGCTGGATCGATgatatcCGATCGATCGTAGCAC |
| Cherry neg control oligo R   | TTTTTT          | CGTCTC             | caccgt                    | GTGCTACGATCGATCGgatatcATCGATCCAGCT |

**Supp. table 3. Guide RNA sequences.** Related to figures 4 and 6.

| Epigenome engineering of <i>Sox10</i> enhancers |                      | Targeted knock-out of core TFs |                       |
|-------------------------------------------------|----------------------|--------------------------------|-----------------------|
| Target/sgRNA                                    | sgRNA sequence       | Target/sgRNA                   | sgRNA sequence        |
| 84_sgRNA_1                                      | AGTCTGCCACCCATCAAAGC | ATF2_sgRNA_1                   | TCAACAACCTGAAACACCGGT |
| 84_sgRNA_2                                      | CCATTGTATCATGCTGGACA | ATF2_sgRNA_2                   | CTTGCTGTTTTTCAGGCATCA |
| 84_sgRNA_3                                      | CTCCACTGAACGAGTCCATG | TFAp2b_sgRNA_1                 | GGAGGAGTGTGAGAAGGTA   |
| 84_sgRNA_4                                      | ATTAATTCCTGCGAACAGAA | TFAp2b_sgRNA_2                 | ACCCTCGCTTACCTTCCACC  |
| 84_sgRNA_5                                      | CCCTTTGTGTATGGGCTCAC | Sox10_sgRNA_1                  | TTCCTCCCCAGTGAGAAGA   |
| 85_sgRNA_1                                      | AGATGTGCTTATGGGCTCCT | Sox10_sgRNA_2                  | GGTAGGAAAACCTTACATTGC |
| 85_sgRNA_2                                      | TGGGAACAATGTCAACTCCG | Arnt2_sgRNA_1                  | AGGGACCCAGCAAATTTTCA  |
| 85_sgRNA_3                                      | GCACAGAGCGGCCCCGTCG  | Arnt2_sgRNA_2                  | TCTTTTGTTTTATAGGTATGA |
| 85_sgRNA_4                                      | TTCAGTACAGCTACTTACAG | NR2C1_sgRNA_1                  | CTCTTTACCGCAGCGTATAC  |
| 85_sgRNA_5                                      | TCTTTCCACCCGCCAGGGC  | NR2C1_sgRNA_2                  | AGACAACCTCTCCAATGAGC  |
| 87_sgRNA_1                                      | CAGGAAGAAATGCGTAGTGA | Sox9_sgRNA_1                   | CTCTCATTCAGCAGCCTG    |
| 87_sgRNA_2                                      | GAGCGAGCAGAGAGTGGAGC | NR2F2_sgRNA_1                  | CCAAAGGGTGAGAGAGGGAA  |
| 87_sgRNA_3                                      | TCTTTGTTCCTGCCTTTAA  | NR2F2_sgRNA_2                  | GGCATGAGACGGGAAGGTAT  |
| 87_sgRNA_4                                      | CTCTAAAACACCCGATTGTC | Otx2_sgRNA_1                   | CCAAAGGGTGAGAGAGGGAA  |
| 87_sgRNA_5                                      | GCAGGAAGGAGGATCTGA   | Otx2_sgRNA_2                   | CCAAAGGGTGAGAGAGGGAA  |
| 89_sgRNA_1                                      | AGGGCATCCCATGCACAAC  | Pax2_sgRNA_1                   | CCAAAGGGTGAGAGAGGGAA  |
| 89_sgRNA_2                                      | GAGGCAACAAATCTTTTCCA | Pax2_sgRNA_2                   | CCAAAGGGTGAGAGAGGGAA  |
| 89_sgRNA_3                                      | AGGCAACTCACTGAGCATGA |                                |                       |
| 89_sgRNA_4                                      | GGGAGAGTAAATGAGACAG  |                                |                       |
| 89_sgRNA_5                                      | CAGTCAGTTGGGCTGCAGAG |                                |                       |
| 99_sgRNA_1                                      | GGTGAGAAATGTTGAAAACG |                                |                       |
