# Supplementary figures and images for: Reconstruction of the Global Neural Crest Gene Regulatory Network In Vivo
Source: PubMed Central journal article supplement — Dev Cell. 2019 Oct 21;51(2):255–276.e7. doi: 10.1016/j.devcel.2019.10.003 (PMC6838682; doi:10.1016/j.devcel.2019.10.003), 2019-10-21

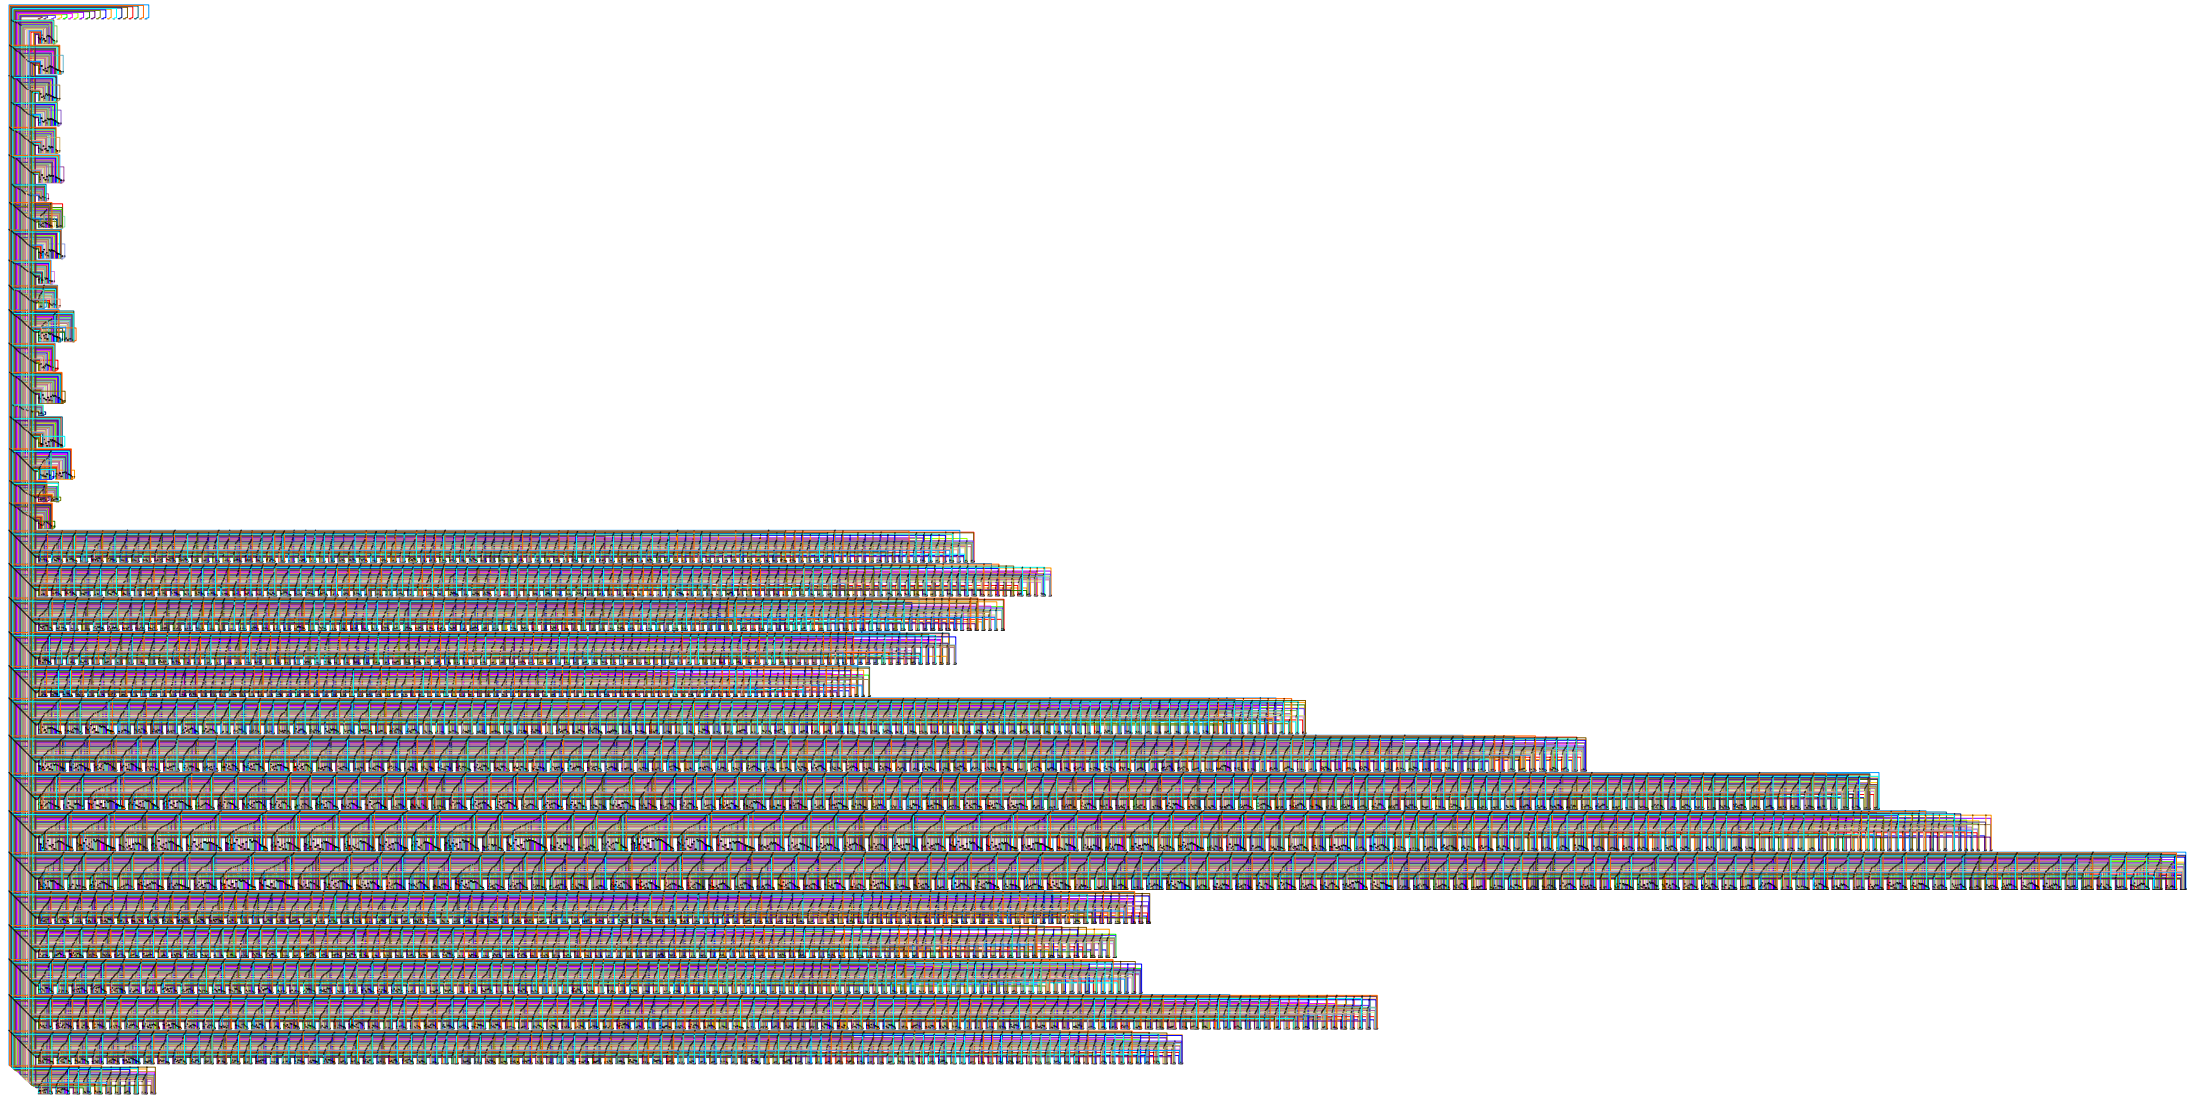

Supplement: mmc2.pdf [file mmc2.pdf]

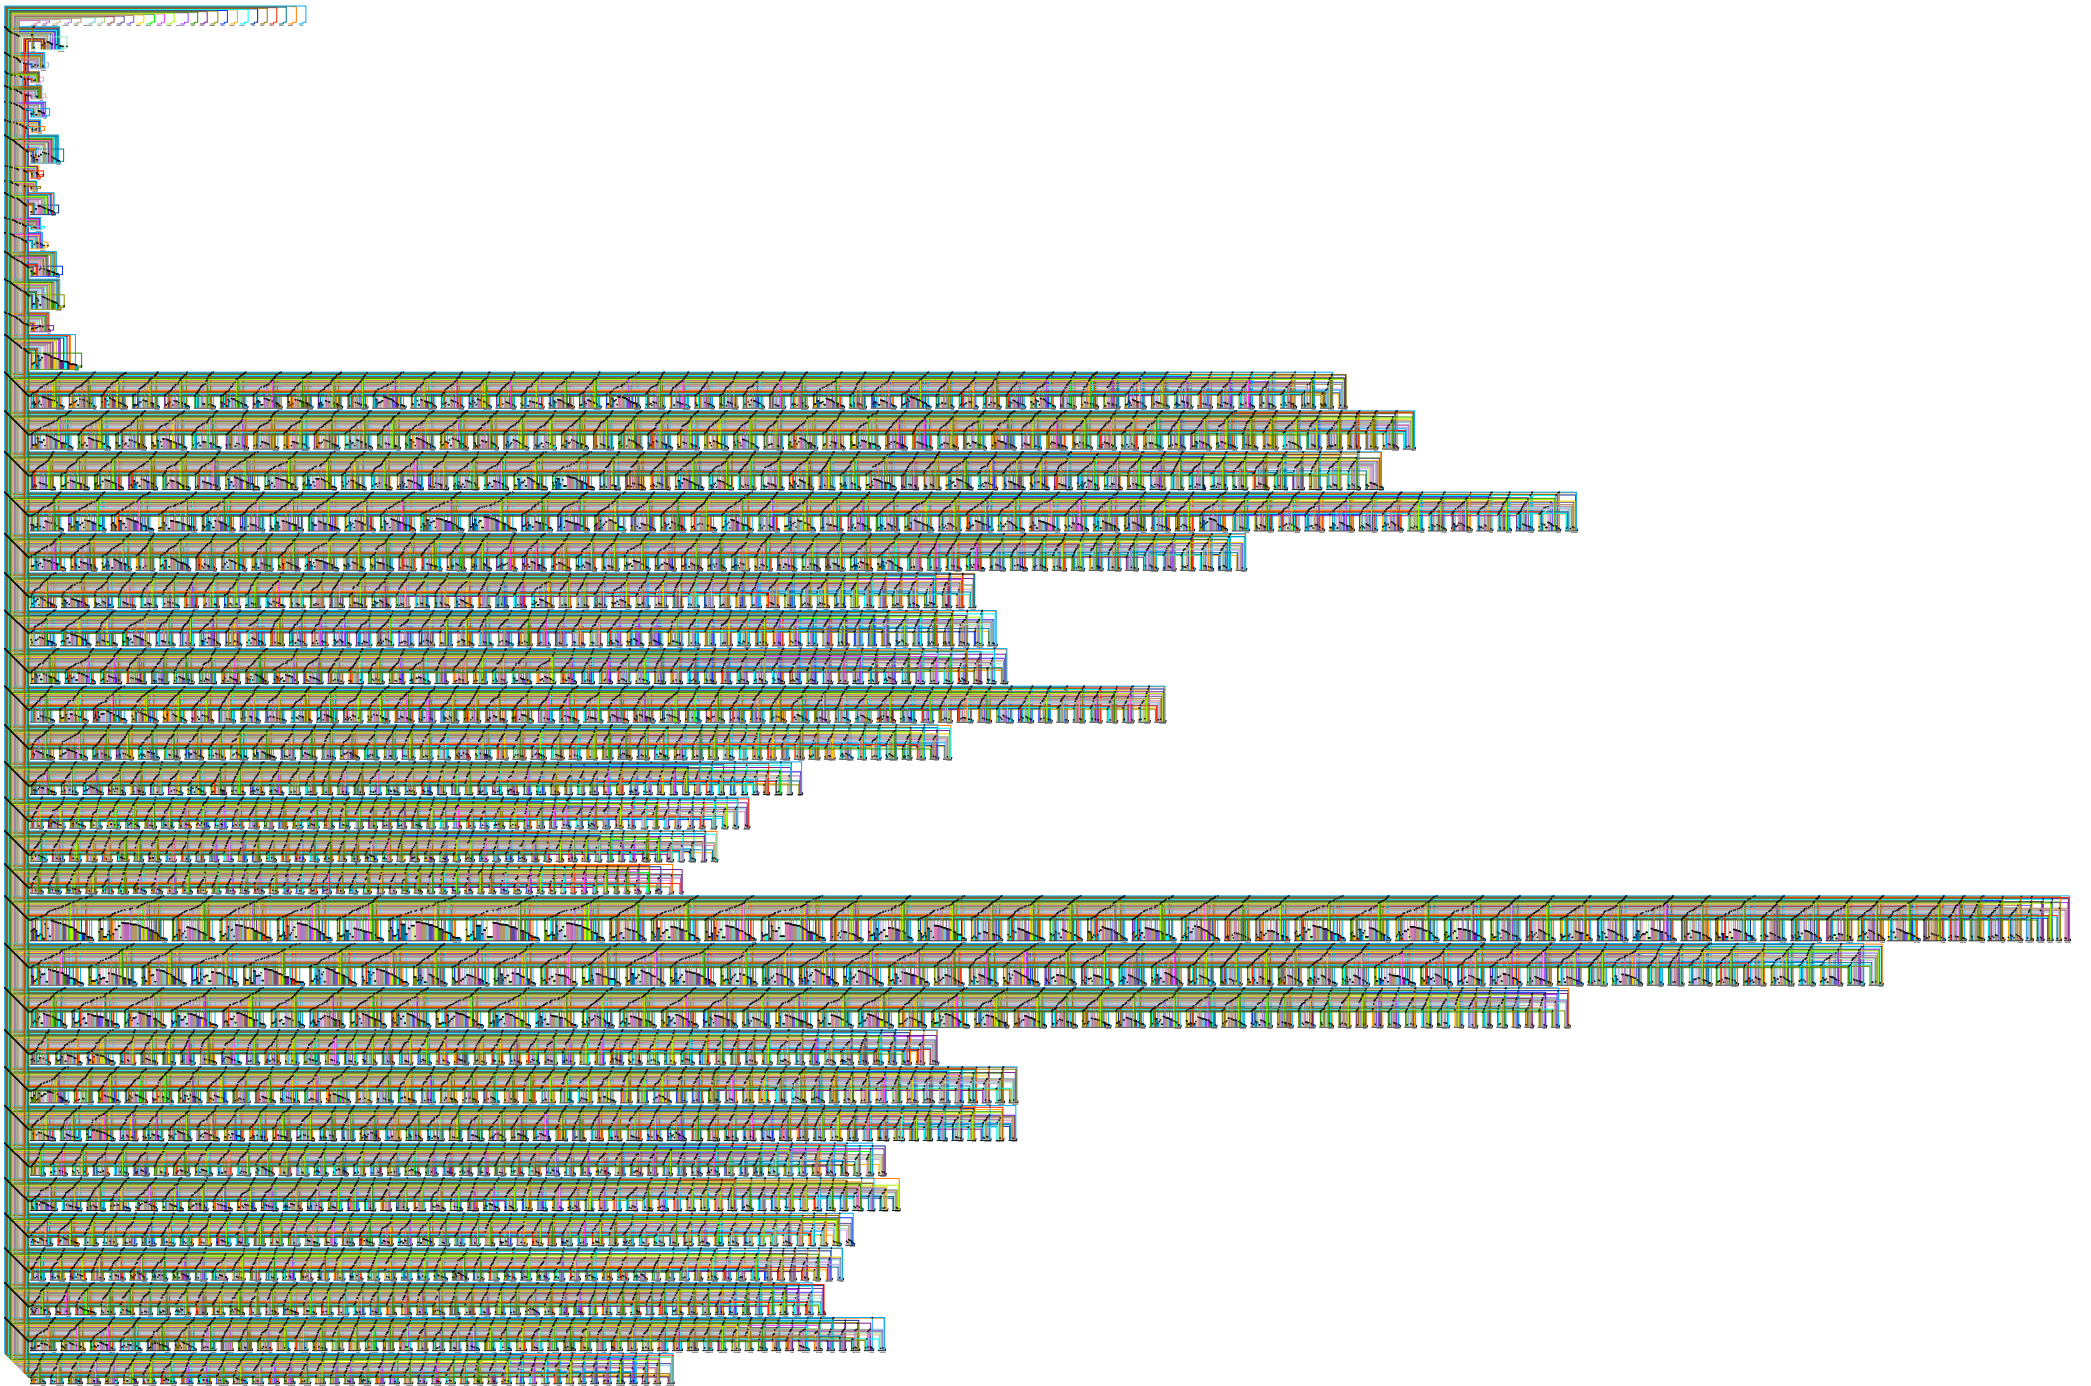

Supplement: mmc3.pdf [file mmc3.pdf]

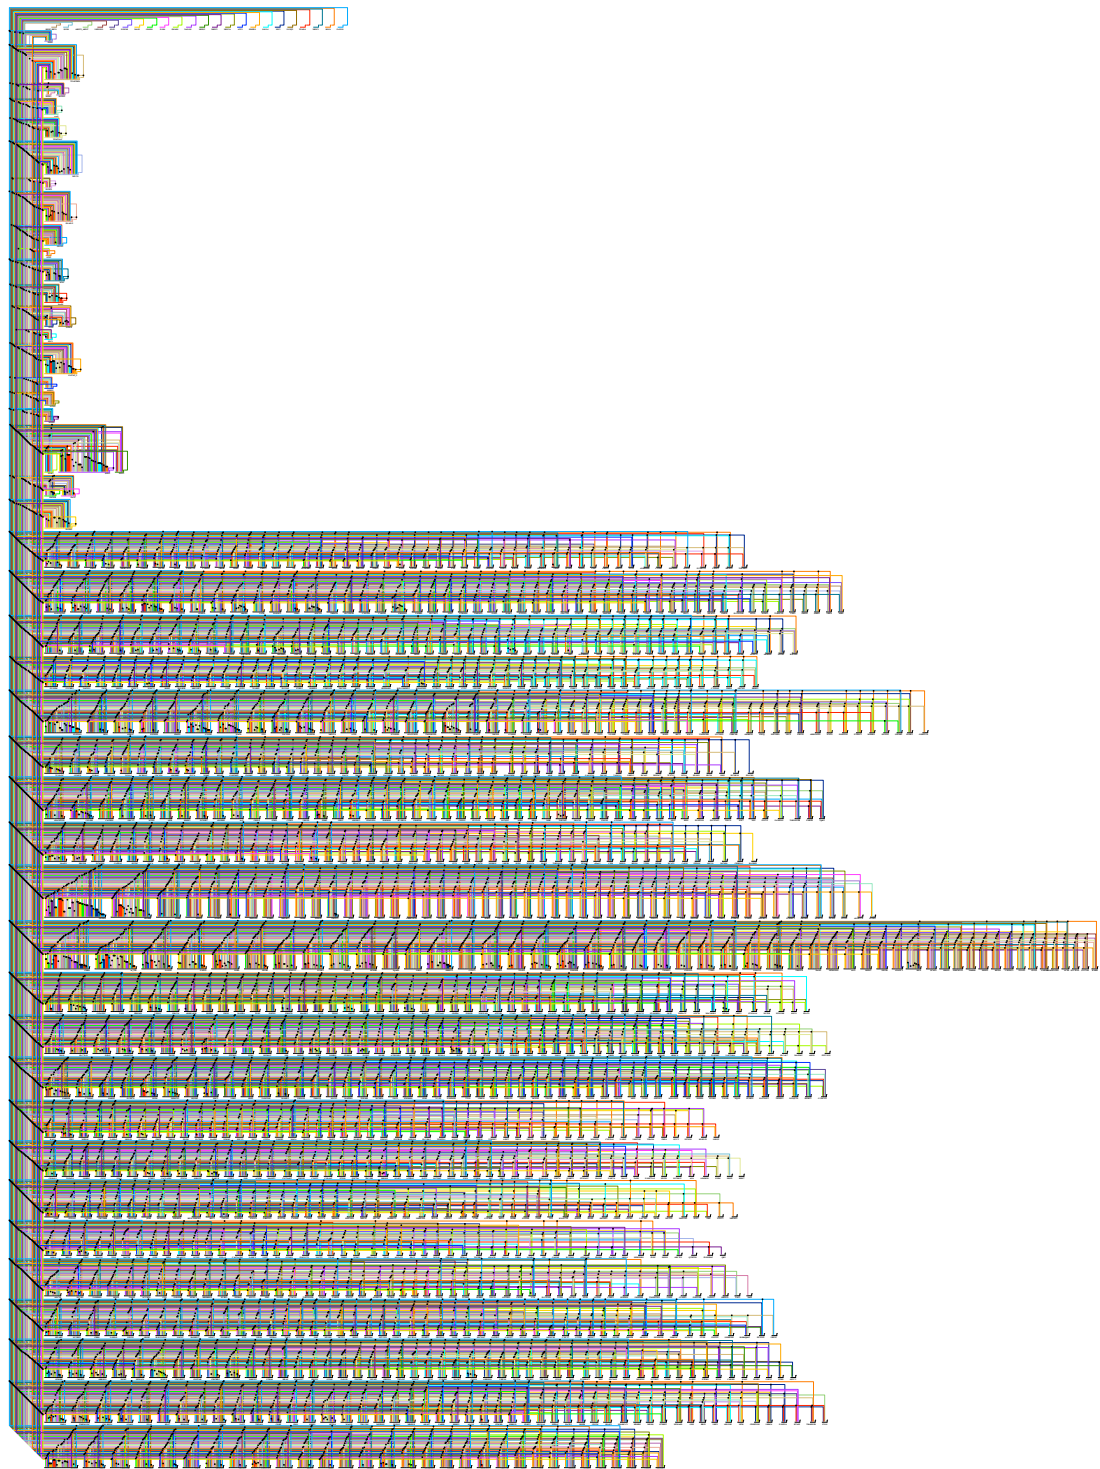

Supplement: mmc4.pdf [file mmc4.pdf]

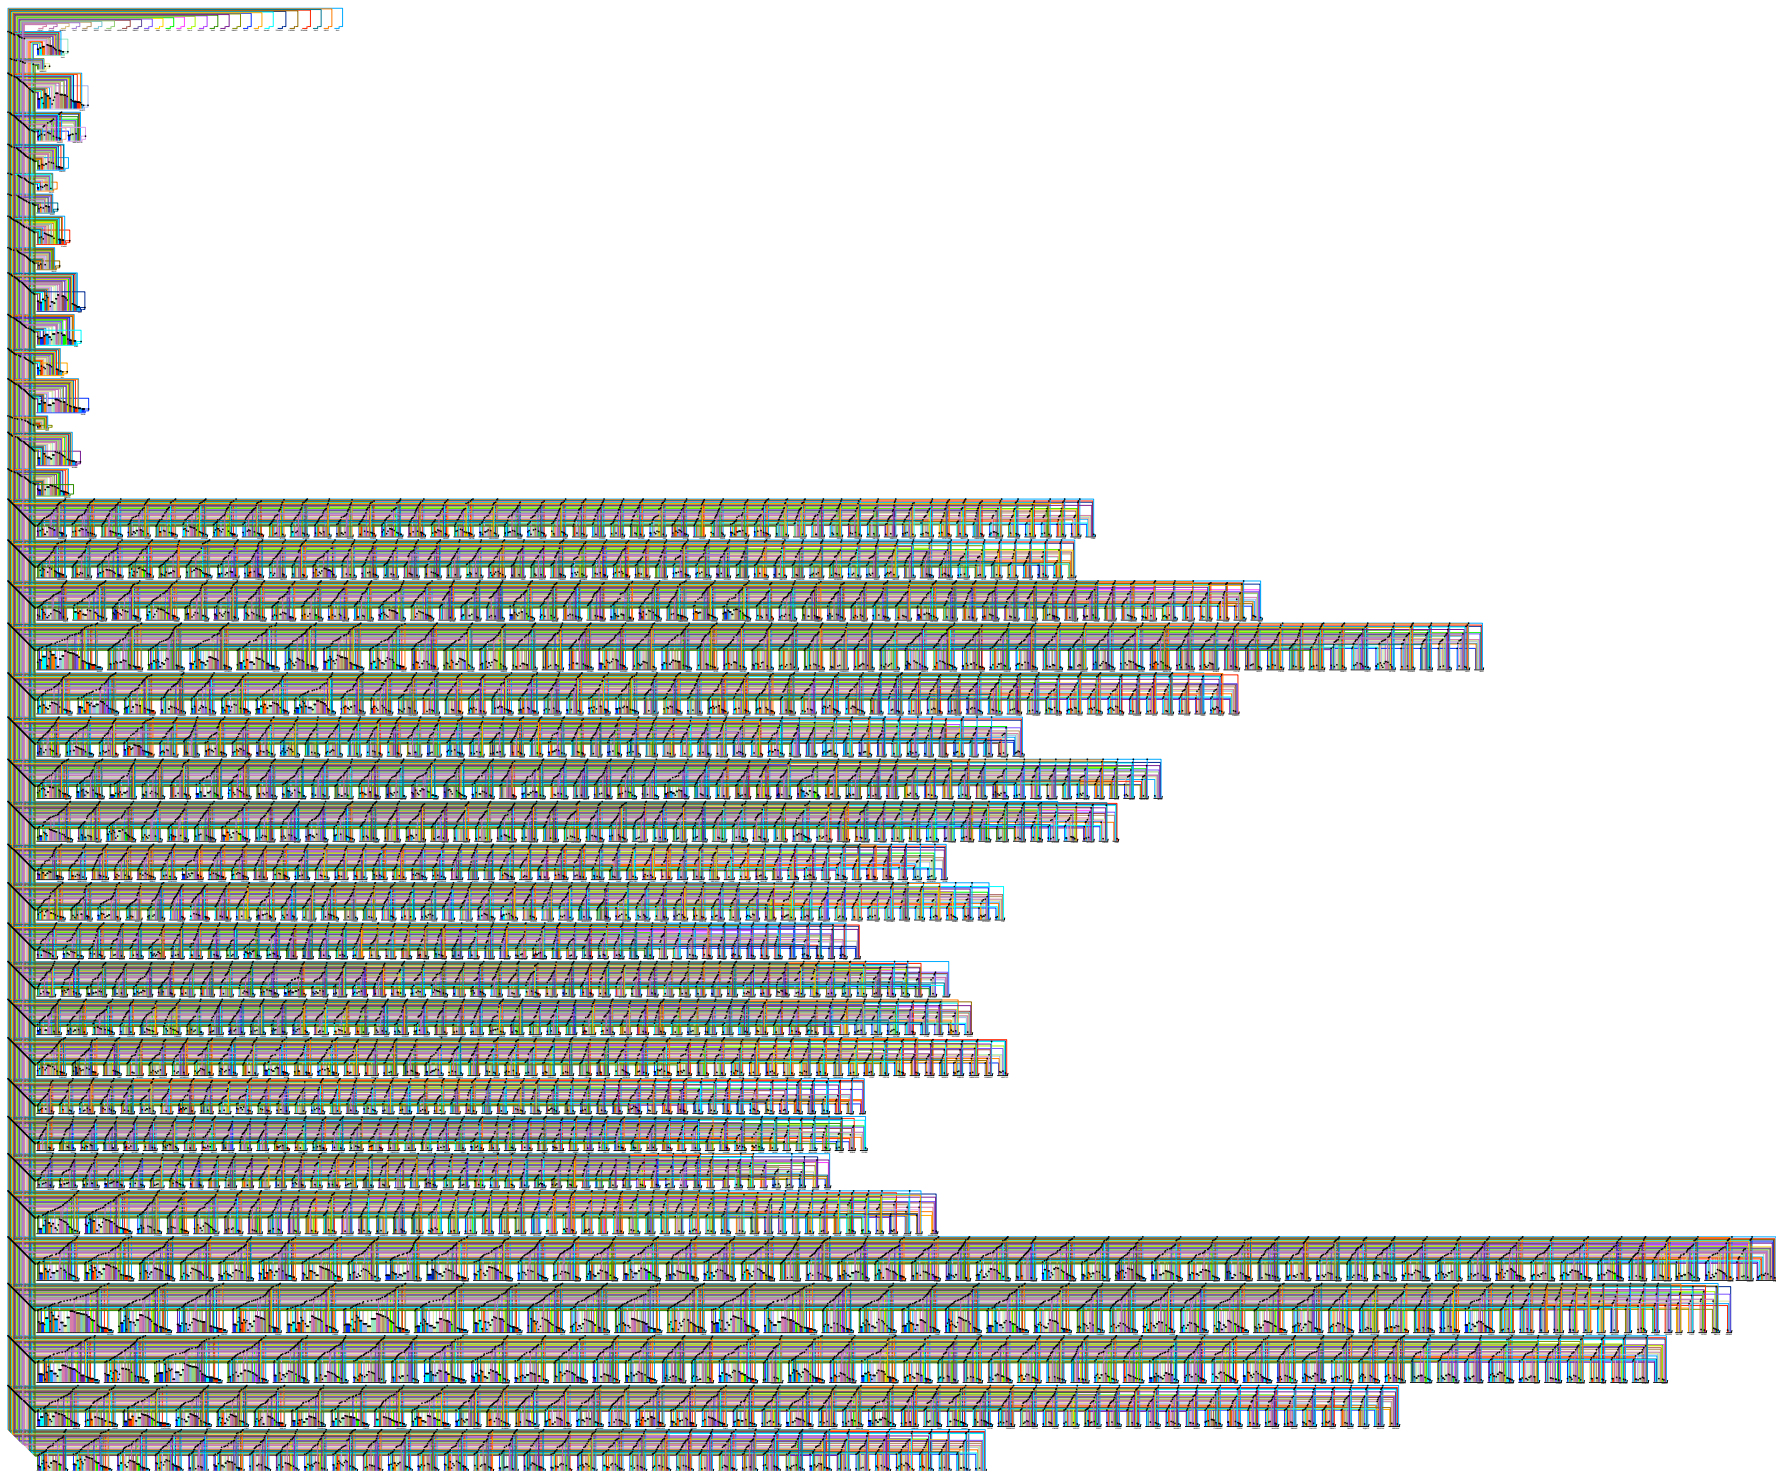

Supplement: mmc5.pdf [file mmc5.pdf]
